# Supplementary material for: High-voltage aqueous symmetric supercapacitors based on 3D bicontinuous, highly wrinkled, N-doped porous graphene-like ultrathin carbon sheets
Source: Royal Society of Chemistry journal article supplement (doi:10.1039/d1nj05191a), 2022-01-01
Supplement: d1nj05191a1.pdf [file d1nj05191a1.pdf]

**High-voltage aqueous symmetric supercapacitor based on 3D  
bicontinuous, highly-wrinkled, N-doped porous graphene-like  
ultrathin carbon sheets**

Boran Tao<sup>a,b,1</sup>, Na Zhang<sup>c,1</sup>, Tian Ye<sup>b,1</sup>, Pengfei Gao<sup>b</sup>, Hongda Li<sup>a,b</sup>, Yuanmiao Xie<sup>a</sup>, Jinghua

Liu<sup>a</sup>, Guofu Wang<sup>a,\*</sup>, Wenfeng Zhang<sup>b</sup>, Haixin Chang<sup>b,\*</sup>

<sup>a</sup> *Liuzhou key laboratory for new energy vehicle power lithium battery, School of  
Microelectronics and Materials Engineering, Guangxi University of Science and Technology,  
Liuzhou, 545006, China*

<sup>b</sup> *Quantum-Nano Matter and Device Lab, State Key Laboratory of Material Processing and  
Die & Mould Technology, School of Materials Science and Engineering, Huazhong  
University of Science and Technology, Wuhan 430074, China*

<sup>c</sup> *Yinchuan University of Science and Technology, Yinchuan 750011, China*

<sup>1</sup> *These authors contributed equally: Boran Tao, Na Zhang, Tian Ye*

*\* Corresponding authors: gfwang@guet.edu.cn (Guofu Wang), hxchang@hust.edu.cn*

*(Haixin Chang)*

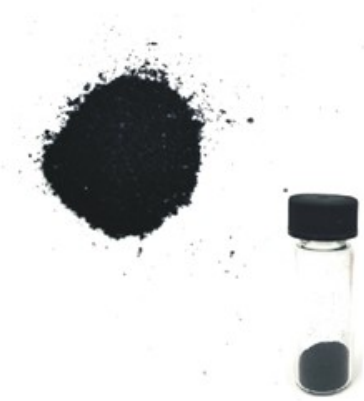

**Fig. S1.** Photographs of 3D BWGC sample

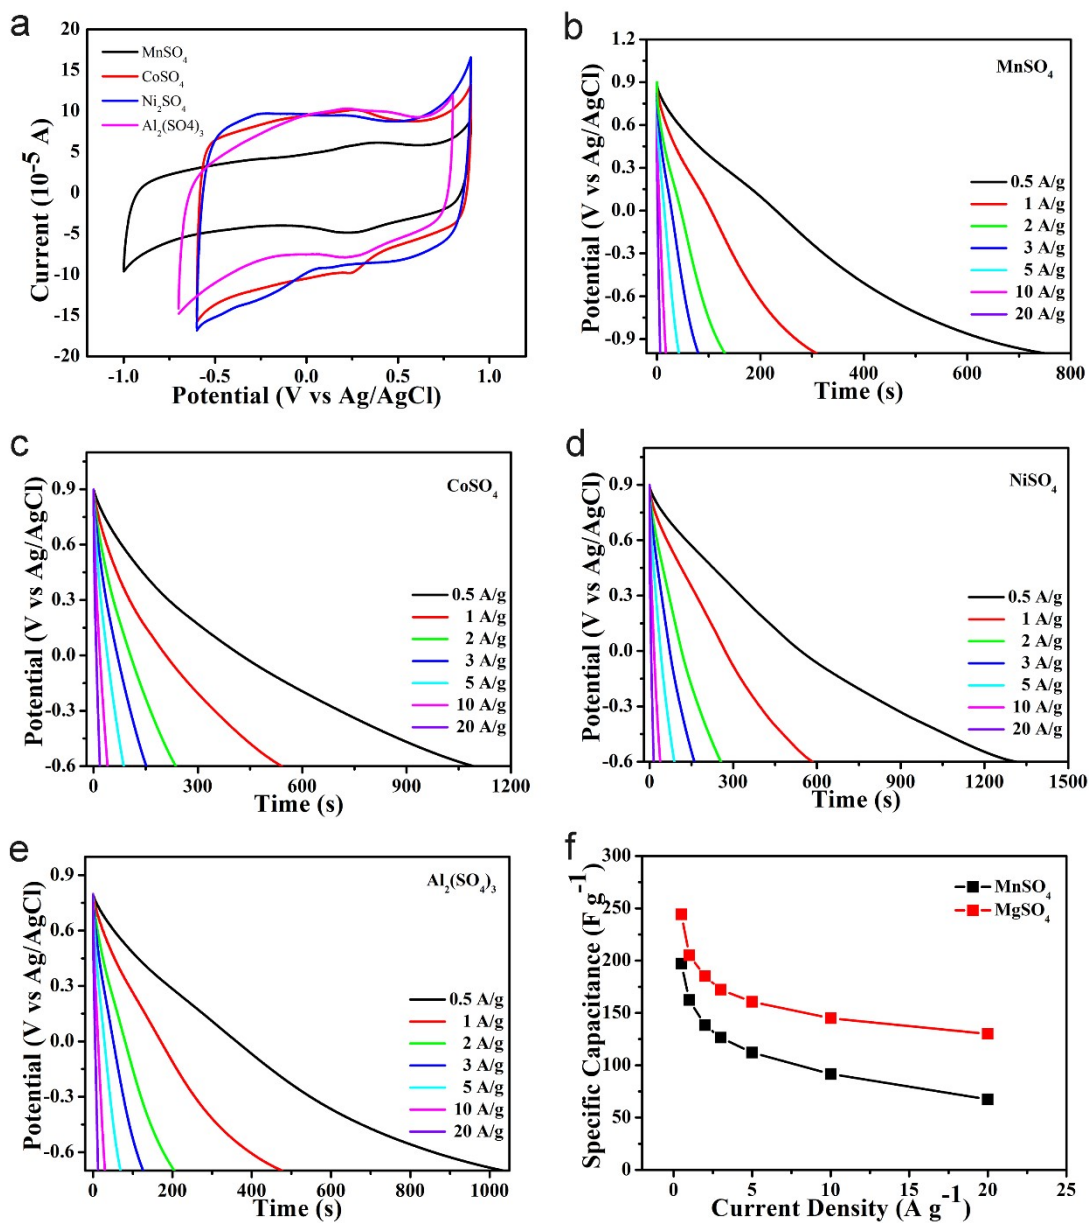

**Fig. S2.** (a) CV curves of 3D BWGC SCs in different electrolytes at scan rate of 5 mV/s. Galvanostatic discharge curve at different current density in the aqueous electrolytes of (b) 4 M  $\text{MnSO}_4$ , (c) 1.3 M  $\text{CoSO}_4$ , (d) 1.7 M  $\text{Ni}_2\text{SO}_4$ , and (e) 1 M  $\text{Al}_2(\text{SO}_4)_3$ . (f) Specific capacitances at different current densities.

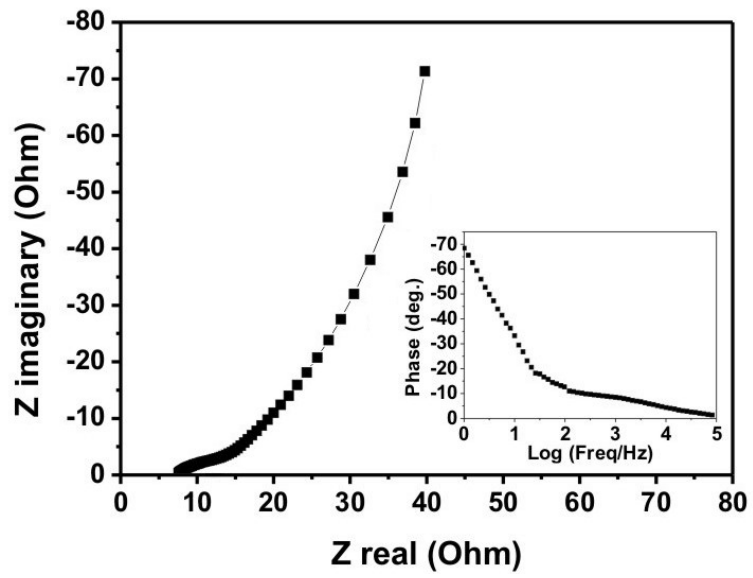

**Fig. S3.** The Nyquist plots of 3D BWGC in 0.5 M MgSO<sub>4</sub> electrolytes.

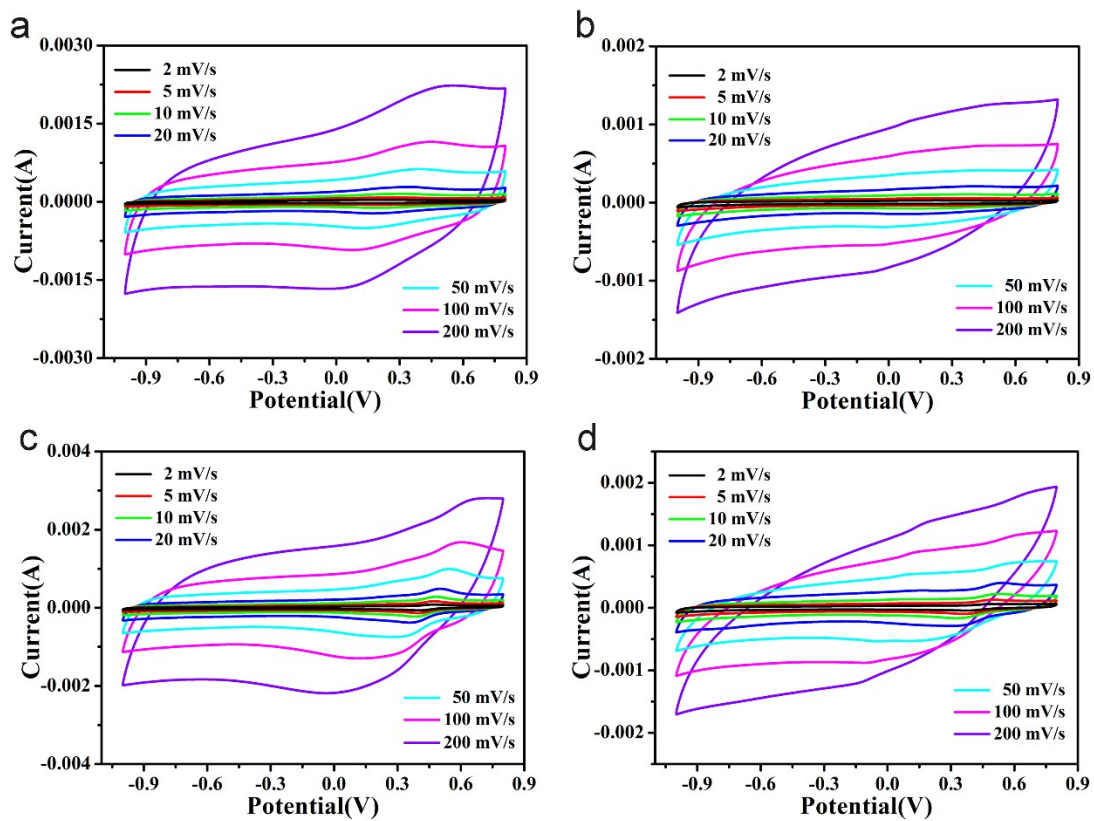

**Fig. S4.** CV curves of 3D BWGC SCs in the aqueous electrolytes of: (a) 2 M  $\text{MgSO}_4$ , (b) 2 M  $\text{MgSO}_4$  + 0.1 M  $\text{Cr}^{3+}$ , (c) 2 M  $\text{MgSO}_4$  + 0.05 M  $\text{Fe}^{2+}$  and (d) 2 M  $\text{MgSO}_4$  + 0.1 M  $\text{Cr}^{3+}$  0.05 M  $\text{Fe}^{2+}$ .

**Table S1.** BET specific surface area, pore volume and pore size of 3D BWGC.

| <b>Surface Area</b>                                                                                         |                             |
|-------------------------------------------------------------------------------------------------------------|-----------------------------|
| Single point surface area at P/Po =0.203237847:                                                             | 2283.8366 m <sup>2</sup> /g |
| BET Surface Area:                                                                                           | 2300.2504 m <sup>2</sup> /g |
| t-Plot Micropore Area:                                                                                      | 680.0004 m <sup>2</sup> /g  |
| t-Plot External Surface Area:                                                                               | 1620.2500 m <sup>2</sup> /g |
| BJH Adsorption cumulative surface area of pores<br>between 1.7000 nm and 300.0000 nm diameter:              | 476.621 m <sup>2</sup> /g   |
| BJH Desorption cumulative surface area of pores<br>between 1.7000 nm and 300.0000 nm diameter:              | 1473.6203 m <sup>2</sup> /g |
| <b>Pore Volume</b>                                                                                          |                             |
| Single point adsorption total pore volume of pores<br>less than 388.5776 nm diameter at P/Po = 0.995016548: | 1.632877 cm <sup>3</sup> /g |
| BJH Adsorption cumulative volume of pores<br>between 1.7000 nm and 300.0000 nm diameter:                    | 0.726599 cm <sup>3</sup> /g |
| BJH Desorption cumulative volume of pores<br>between 1.7000 nm and 300.0000 nm diameter:                    | 1.294348 cm <sup>3</sup> /g |
| <b>Pore Size</b>                                                                                            |                             |
| Adsorption average pore width (4V/A by BET):                                                                | 2.83948 nm                  |
| BJH Adsorption average pore diameter (4V/A):                                                                | 6.0979 nm                   |
| BJH Desorption average pore diameter (4V/A):                                                                | 3.5134 nm                   |

**Table S2.** Properties of 3D BWGC in different nature aqueous

| Electrolyte                                     | Operating voltage (V) | Capacitance (F g <sup>-1</sup> ) at different current density (A g <sup>-1</sup> ) |       |       |       |       |       |       |
|-------------------------------------------------|-----------------------|------------------------------------------------------------------------------------|-------|-------|-------|-------|-------|-------|
|                                                 |                       | 0.5                                                                                | 1     | 2     | 3     | 5     | 10    | 20    |
| MnSO <sub>4</sub>                               | 1.9                   | 197.5                                                                              | 163.4 | 138.3 | 127.4 | 112.4 | 92.2  | 67.2  |
| MgSO <sub>4</sub>                               | 1.8                   | 244.2                                                                              | 205.1 | 185.1 | 172.2 | 161.2 | 145.1 | 130.2 |
| CoSO <sub>4</sub>                               | 1.5                   | 364.3                                                                              | 361.4 | 316.2 | 303.3 | 289.3 | 268.1 | 240.2 |
| Ni <sub>2</sub> SO <sub>4</sub>                 | 1.5                   | 439.4                                                                              | 390.4 | 342.3 | 322.3 | 296.2 | 254.4 | 199.2 |
| Al <sub>2</sub> (SO <sub>4</sub> ) <sub>3</sub> | 1.5                   | 345.6                                                                              | 318.5 | 273.5 | 252.3 | 230.5 | 200.3 | 168.3 |

**Table S3.** Comparison of specific capacitance ( $C_s$ ), energy density (E) and power density (P) of SCs with different electrolytes.

| Electrolyte                                            | CC test at 0.5 A g <sup>-1</sup> |              |            | CC test at 10 A g <sup>-1</sup> |             |             |
|--------------------------------------------------------|----------------------------------|--------------|------------|---------------------------------|-------------|-------------|
|                                                        | C <sub>s</sub> (F/g)             | E(Wh/kg)     | P(W/kg)    | C <sub>s</sub> (F/g)            | E(Wh/kg)    | P(W/kg)     |
| MgSO <sub>4</sub>                                      | 244.2                            | 109.9        | 450        | 145                             | 62.3        | 9000        |
| MgSO <sub>4</sub> +Cr <sup>3+</sup>                    | 215.8                            | 97.1         | 450        | 102.8                           | 46.2        | 9000        |
| MgSO <sub>4</sub> +Fe <sup>2+</sup>                    | 317.2                            | 142.8        | 450        | <b>183.9</b>                    | <b>82.8</b> | <b>9000</b> |
| MgSO <sub>4</sub> +Cr <sup>3+</sup> + Fe <sup>2+</sup> | <b>347.8</b>                     | <b>156.5</b> | <b>450</b> | 158.9                           | 71.5        | 9000        |
